# Supplementary material for: Hypoxanthine in the microenvironment can enable thiopurine resistance in acute lymphoblastic leukemia
Source: PubMed Central journal article supplement (PMC11294174; doi:10.3389/fonc.2024.1440650), 2024-07-19
Supplement: Image_1.pdf [file Image_1.pdf]

# Supplemental Figure 1

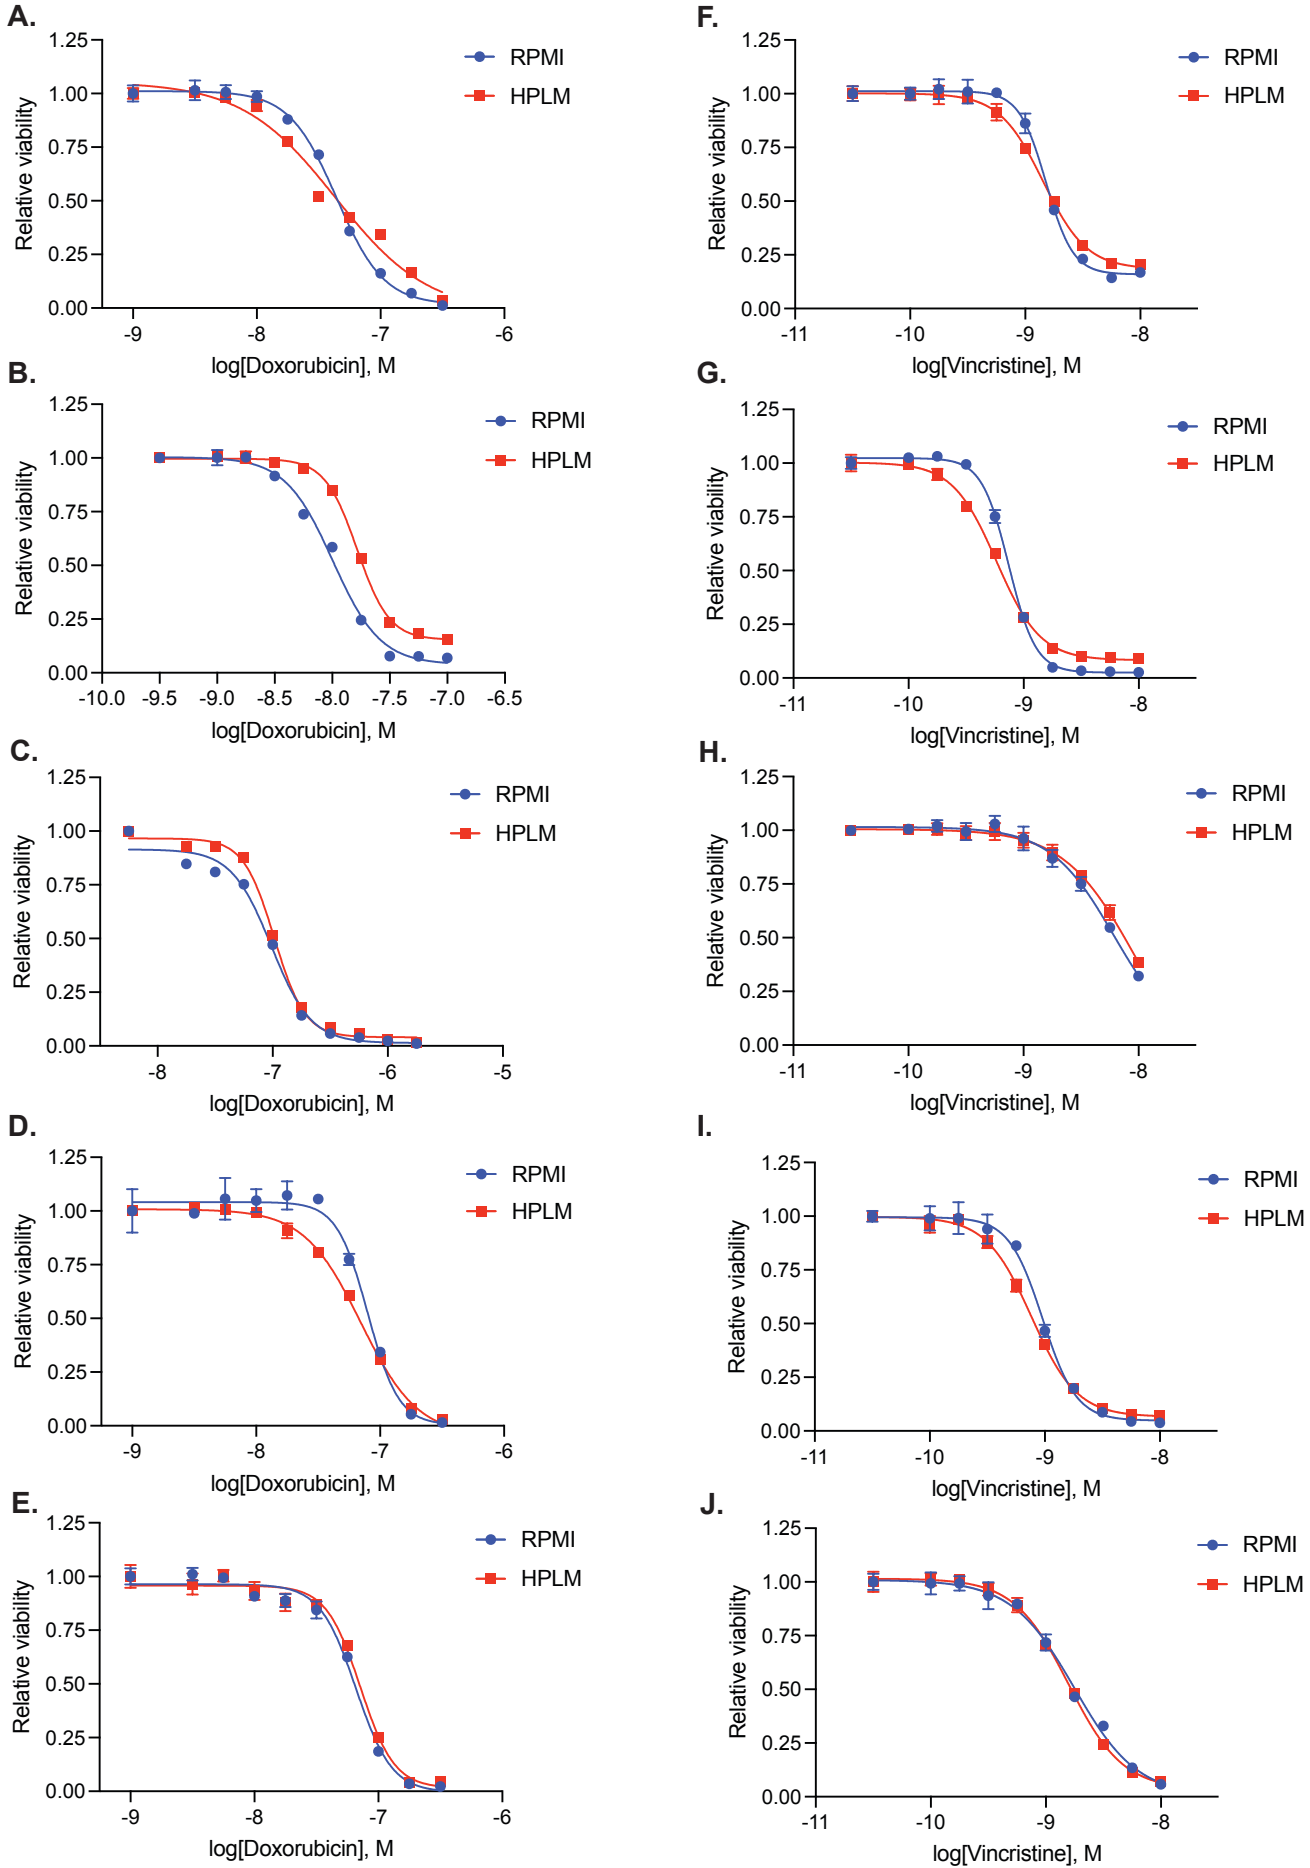

## Supplemental Figure 2

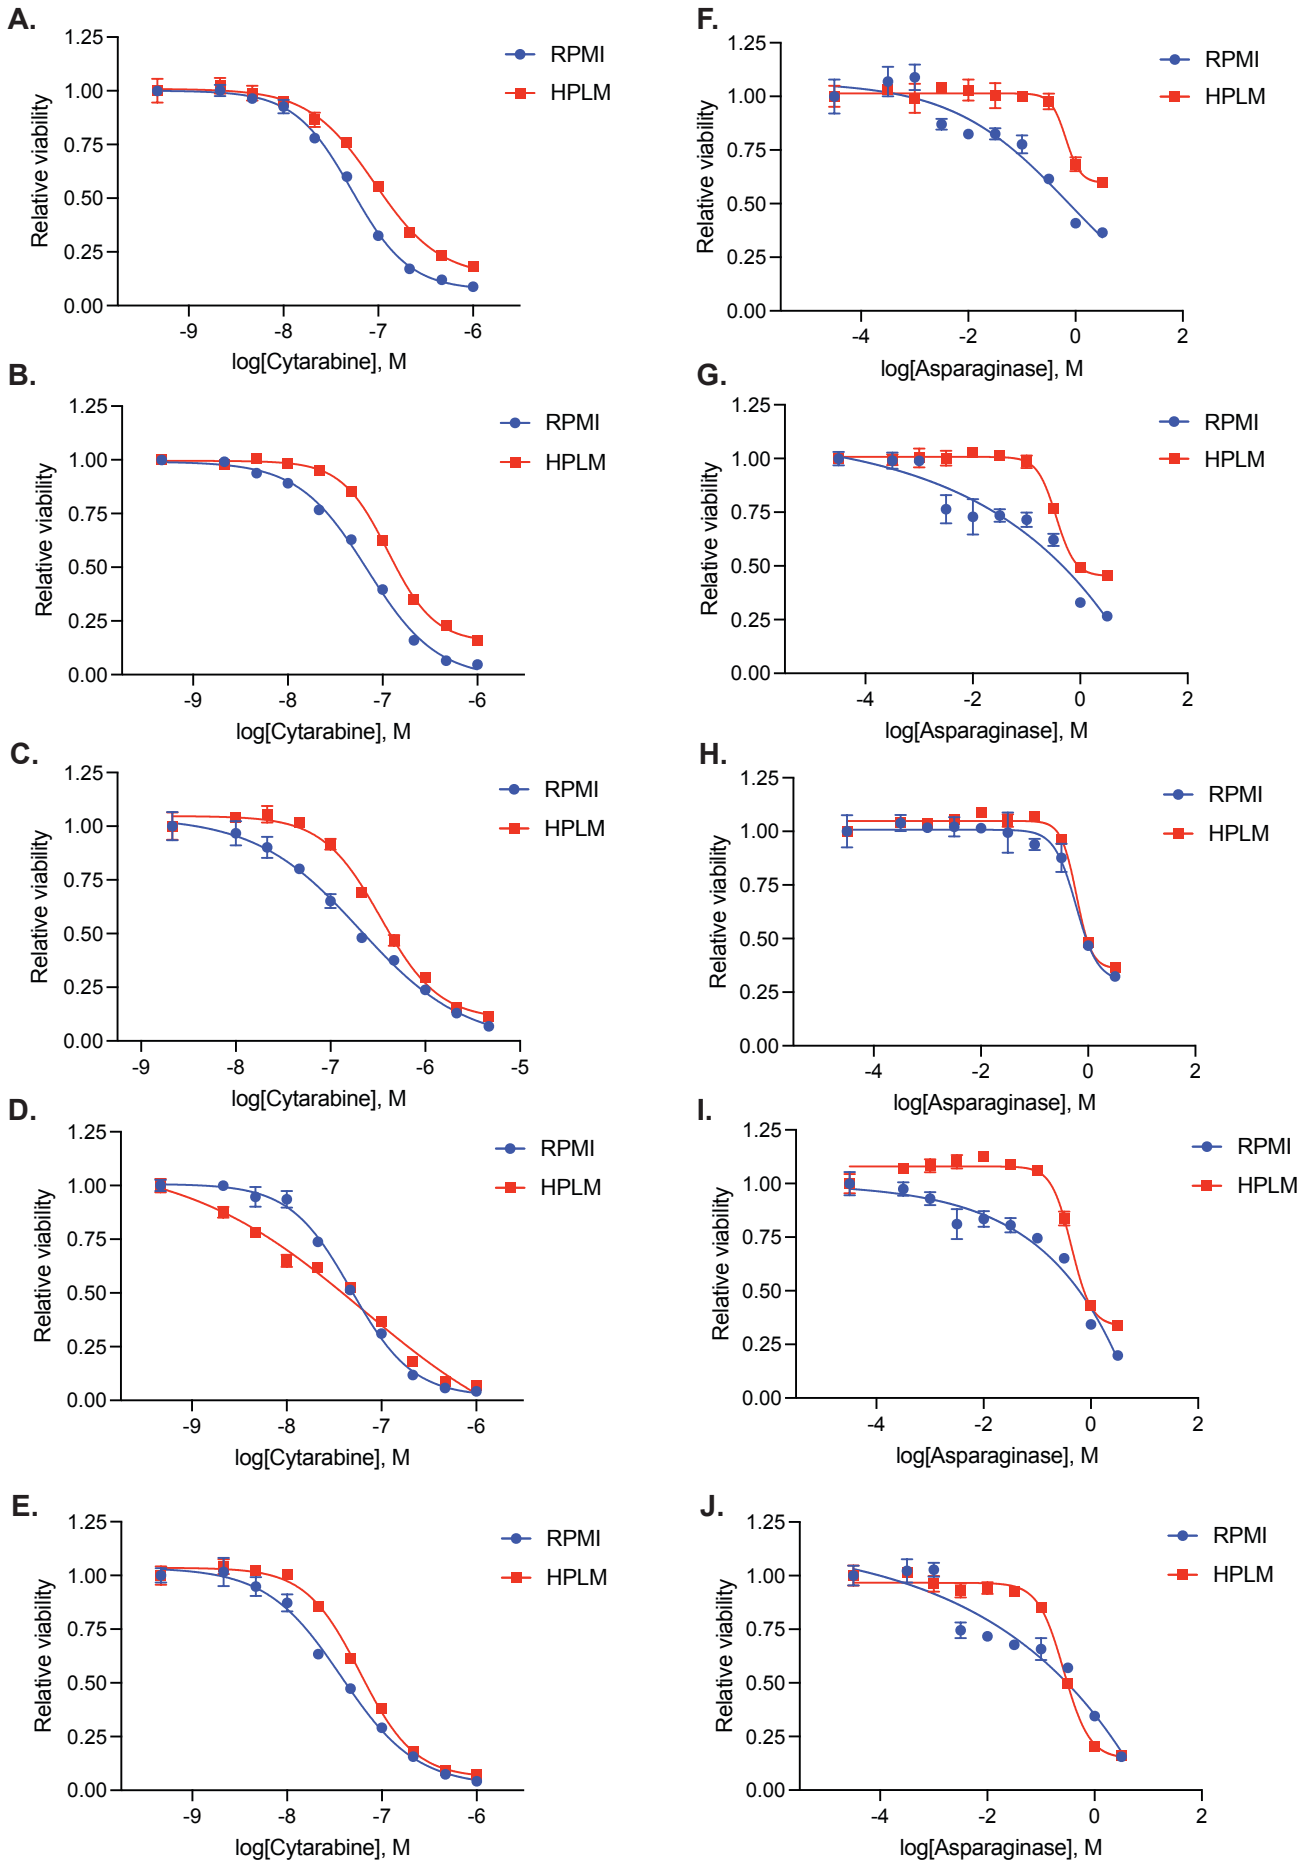

### Supplemental Figure 3

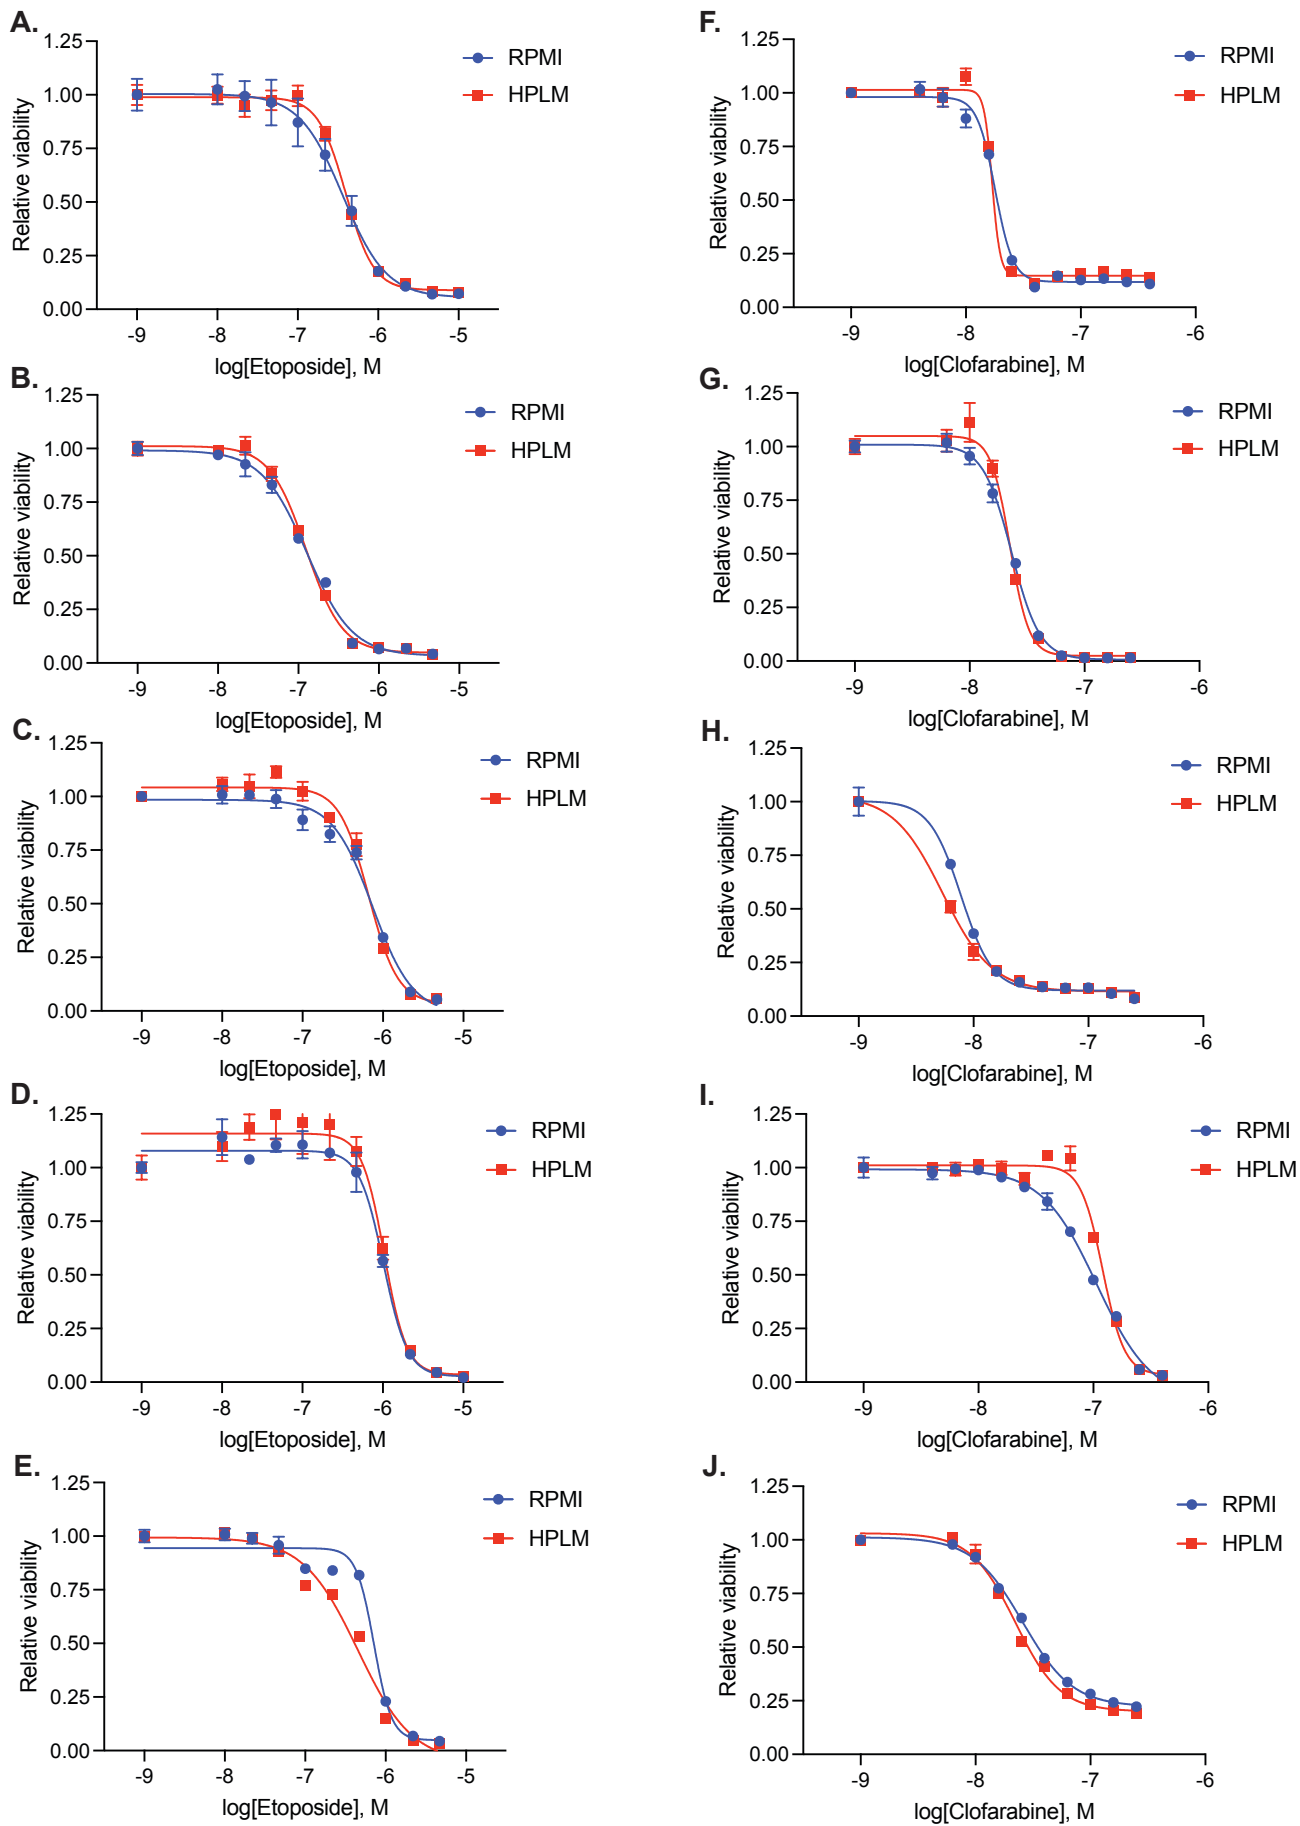

## Supplemental Figure 4

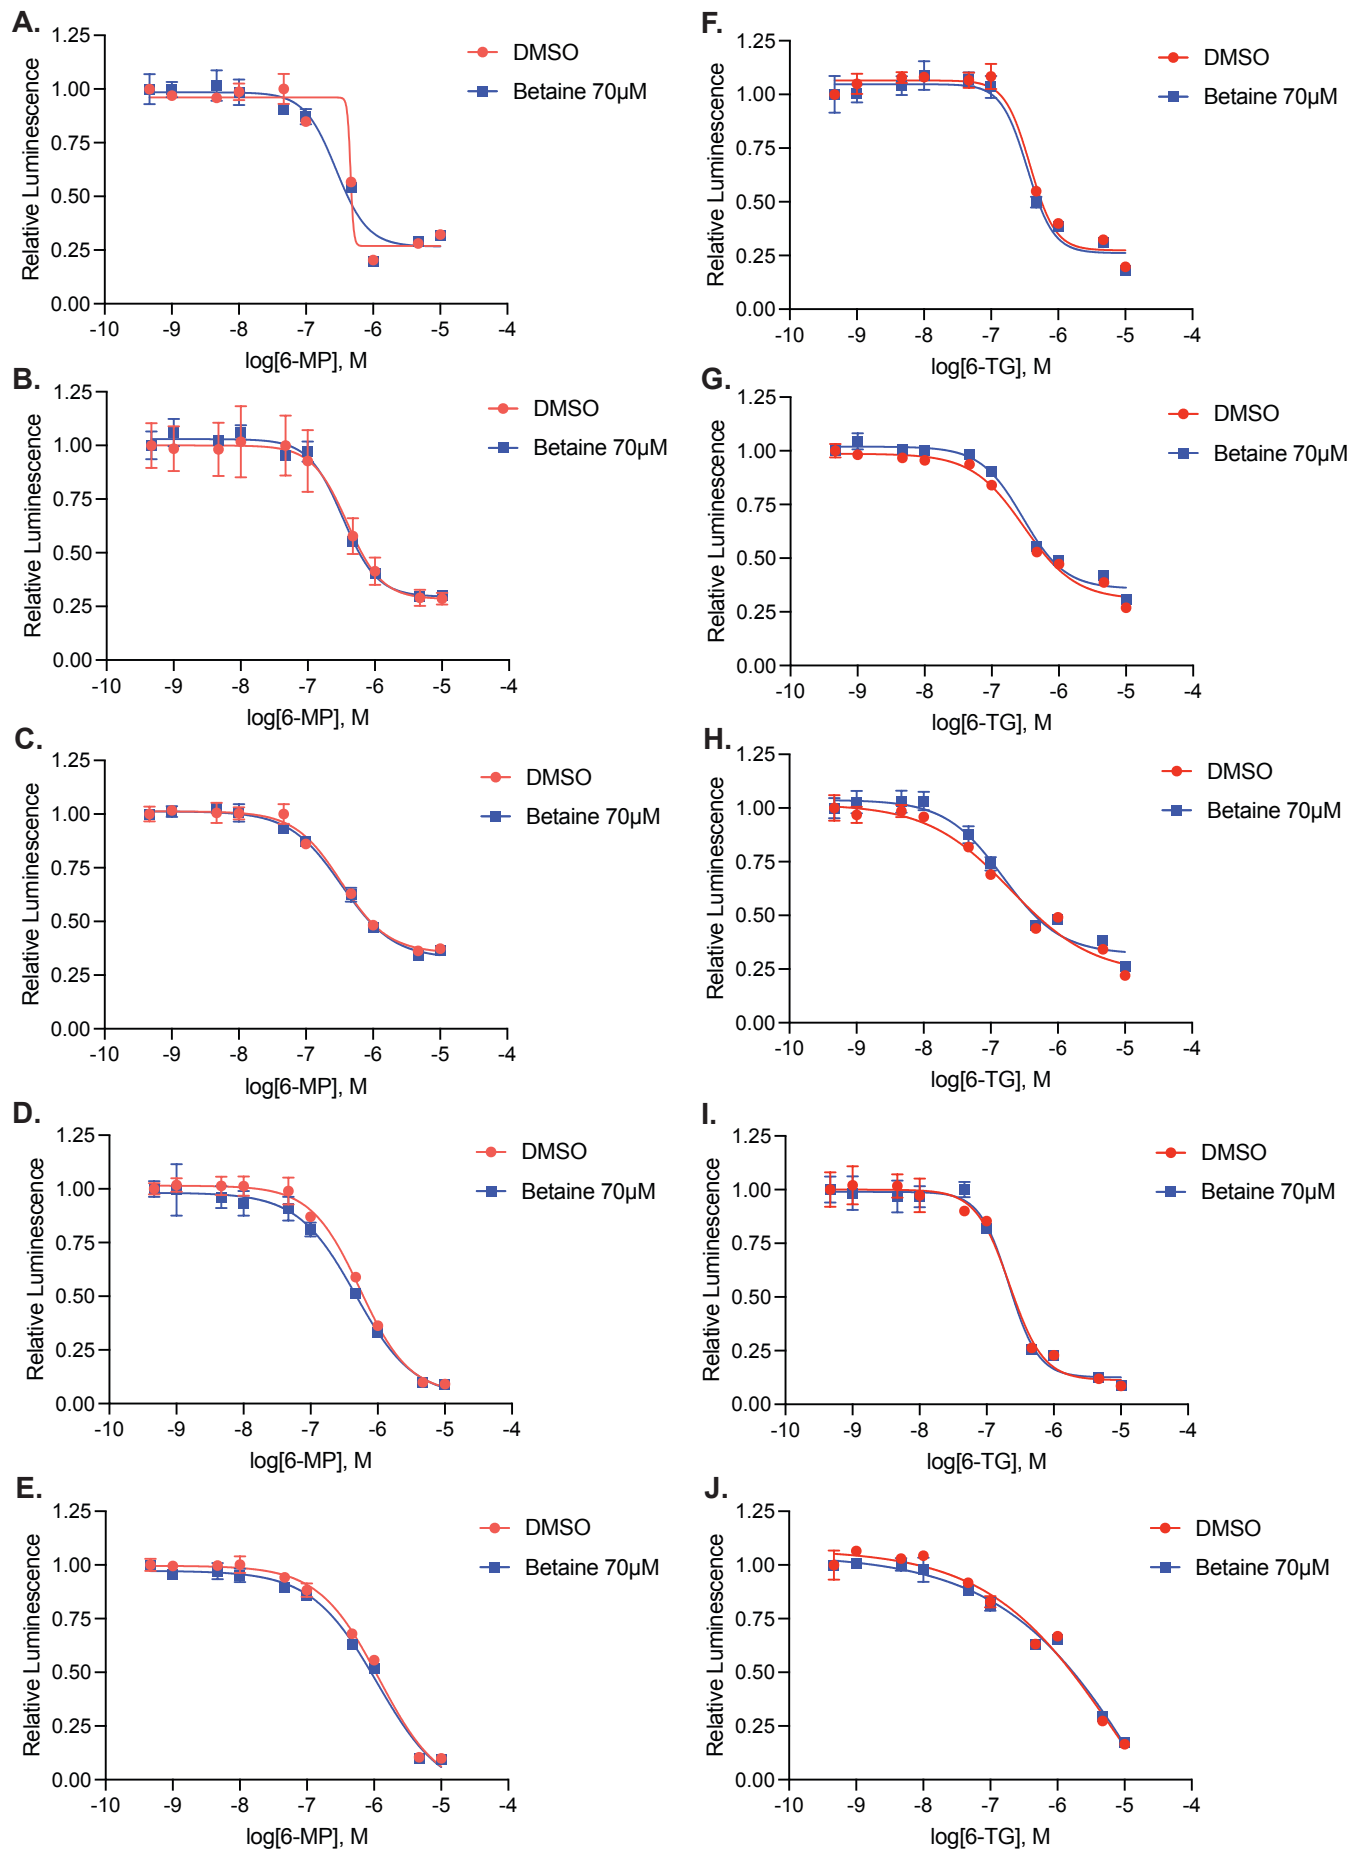

## Supplemental Information

### Supplemental Figure Legends:

**Supplemental Figure 1: Leukemia cell chemotherapy sensitivity in regular compared to human plasma-like media.** Doxorubicin (A-E) and vincristine (F-J) dose-response curves for leukemia cells (NALM-6, A, F; REH, B, G; SEM, C, H; Jurkat, D, I; CEM, E, J) in regular or human plasma-like media. Leukemia cell viability was assessed after 48 hours of drug treatment using the CellTiter-Glo Luminescent Cell Viability Assay. Error bars represent the mean  $\pm$  SD of three technical replicates.

**Supplemental Figure 2: Leukemia cell chemotherapy sensitivity in regular compared to human plasma-like media.** Cytarabine (A-E) and vincristine (F-J) dose-response curves for leukemia cells (NALM-6, A, F; REH, B, G; SEM, C, H; Jurkat, D, I; CEM, E, J) in regular or human plasma-like media. Leukemia cell viability was assessed after 48 hours of drug treatment using the CellTiter-Glo Luminescent Cell Viability Assay. Error bars represent the mean  $\pm$  SD of three technical replicates.

**Supplemental Figure 3: Leukemia cell chemotherapy sensitivity in regular compared to human plasma-like media.** Etoposide (A-E) and clofarabine (F-J) dose-response curves for leukemia cells (NALM-6, A, F; REH, B, G; SEM, C, H; Jurkat, D, I; CEM, E, J) in regular or human plasma-like media. Leukemia cell viability was assessed after 48 hours of drug treatment using the CellTiter-Glo Luminescent Cell Viability Assay. Error bars represent the mean  $\pm$  SD of three technical replicates.

**Supplemental Figure 4: Betaine supplementation of regular media dose not impact leukemia cell sensitivity to thiopurines.** 6-MP (A-E) and 6-TG (F-J) dose-response curves for leukemia cells (NALM-6, A, F; REH, B, G; SEM, C, H; Jurkat, D, I; CEM, E, J) in regular media supplemented with betaine 70  $\mu$ M or DMSO control. Leukemia cell viability was assessed after 48 hours of drug treatment using the CellTiter-Glo Luminescent Cell Viability Assay. Error bars represent the mean  $\pm$  SD of three technical replicates.
